# Supplementary material for: RMT- Una nueva dimensión para el granallado de piezas pequeñas
Source: MDPI journal article supplement (doi:10.3390/metabo13101058), 2013-01-01
Supplement: s1 [file s1]

Supplementary Materials

# Gas Chromatography–Mass Spectrometry Reveals Stage-Specific Metabolic Signatures of Ankylosing Spondylitis

Yixuan Guo <sup>1,†</sup>, Shuangshuang Wei <sup>1,†</sup>, Mengdi Yin <sup>1</sup>, Dandan Cao <sup>1</sup>, Yiling Li <sup>1</sup>, Chengping Wen <sup>1,2,\*</sup> and Jia Zhou <sup>1,2,\*</sup>

<sup>1</sup> Institute of Basic Research in Clinical Medicine, College of Basic Medical Sciences, Zhejiang Chinese Medical University, Hangzhou 310053, China; guoyixuan1725@gmail.com (Y.G.); w91315@gmail.com (S.W.); 202111114811060@zcmu.edu.cn (M.Y.); 202211110211002@zcmu.edu.cn (D.C.); 202211110211021@zcmu.edu.cn (Y.L.)

<sup>2</sup> Key Laboratory of Chinese Medicine Rheumatology of Zhejiang Province, Zhejiang Chinese Medical University, Hangzhou 310053, China

\* Correspondence: wencp@zcmu.edu.cn (C.W.); zhoujia@zcmu.edu.cn (J.Z.)

† These authors contributed equally to this work.

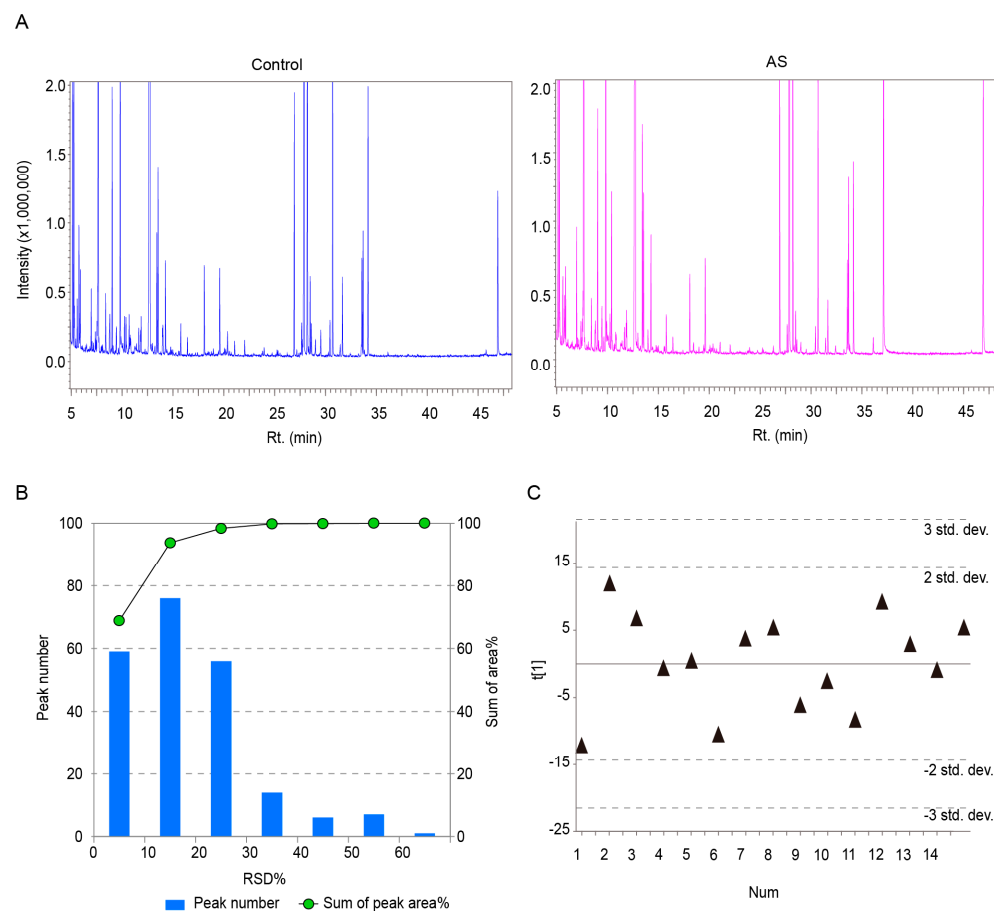

**Figure S1.** Analytical characteristics of the serum metabolic profiling method. (A) Representative TIC chromatograms of serum from patients with AS and healthy controls, (B) The distribution of the RSD% for metabolites in QCs, and (C) PCA score plot of QCs on PC1.

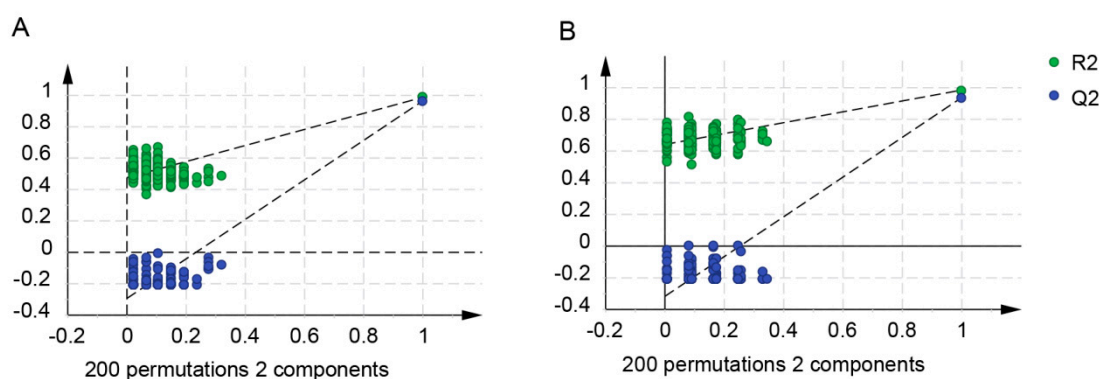

**Figure S2.** Validation plots for OSC PLS-DA models. (A) Controls vs AS patients, (B) remission stage vs acute stage.
